# Supplementary material for: Whole-Genome Identification and Expression Pattern of the Vicinal Oxygen Chelate Family in Rapeseed (Brassica napus L.)
Source: PubMed Central journal article supplement (PMC5422514; doi:10.3389/fpls.2017.00745), 2017-05-09

**Whole-genome identification and expression pattern of the vicinal oxygen chelate family in Rapeseed (*Brassica napus* L.)**

Yu Liang<sup>1, 2</sup>, Neng Wan<sup>1</sup>, Zao Cheng<sup>1</sup>, Yufeng Mo<sup>1</sup>, Baolin Liu<sup>1</sup>, Hui Liu<sup>1</sup>, Nadia Raboanatahiry<sup>1</sup>, Yongtai Yin<sup>1</sup>, Maoteng Li<sup>1, 2\*</sup>

<sup>1</sup> Department of Biotechnology, College of Life Science and Technology, Huazhong University of Science and Technology, Wuhan, China, 430074.

<sup>2</sup> Hubei Collaborative Innovation Center for the Characteristic Resources Exploitation of Dabie Mountains, Huanggang Normal University, Huanggang 438000, China

\*correspondence author: E-mail: [limaoteng426@mail.hust.edu.cn](mailto:limaoteng426@mail.hust.edu.cn)

## Supplementary Information:

### Image legends

**Image S1. Motif patterns of different *BnaVOC* families and WebLogo plot of consensus motifs in each *BnaVOC* gene family.** The *B. napus* VOC proteins were selected for alignment, and VOC motifs are shown as motif 2 (light blue box). The Pfam codes of the VOC motifs of each family are shown. The lengths of the *BnaVOC* genes can be estimated using the scale at the bottom.

### Image S1

# GLY I

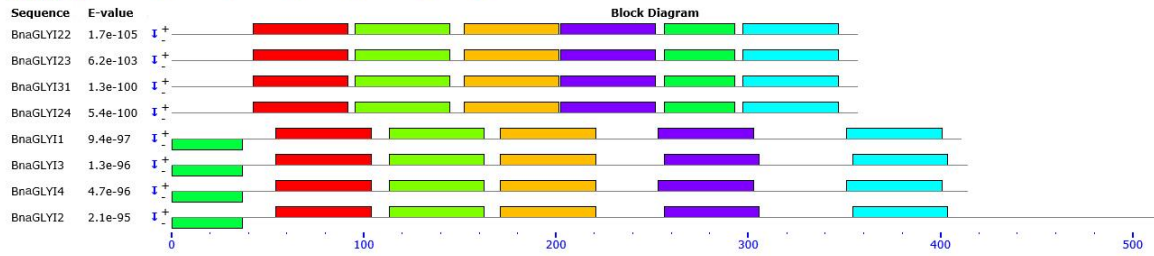

# HPPD

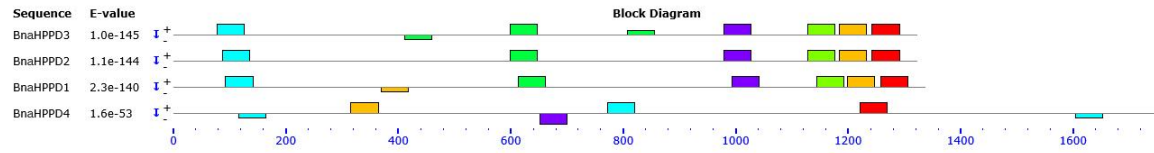

# GLY I

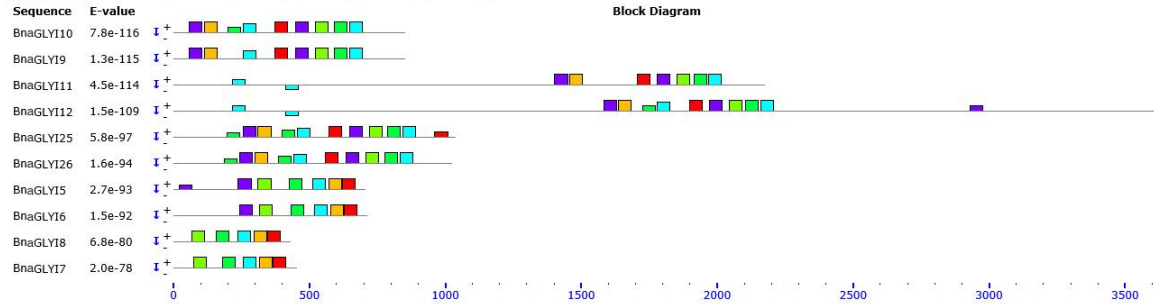

# GLY I

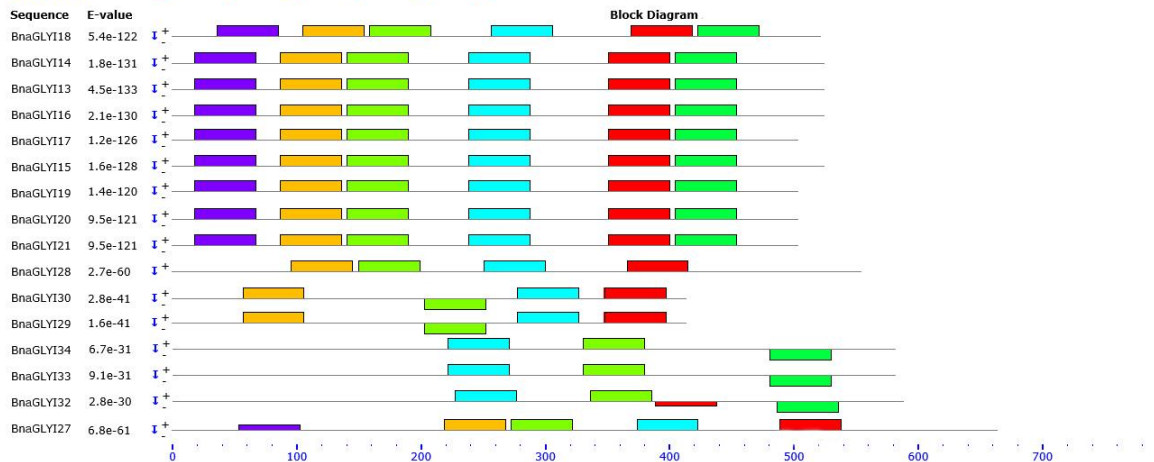

# motif-pfam00903

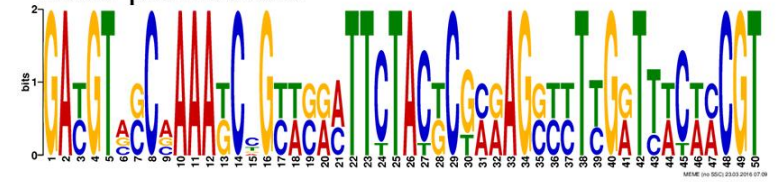

# motif-pfam14696

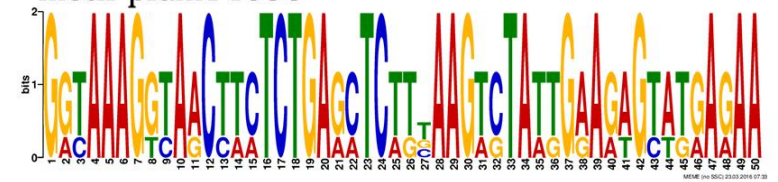

# motif-pfam00903

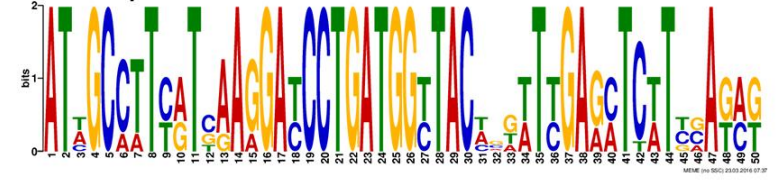

# motif-pfam00903

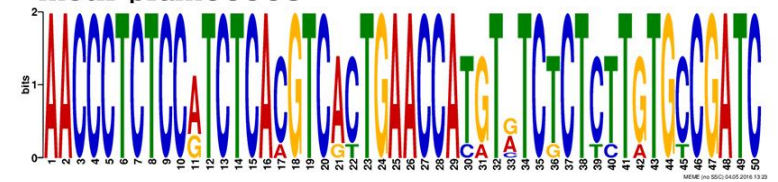

Supplement: Image1.pdf [file Image1.pdf]
