# Supplementary material for: Whole-Genome Identification and Expression Pattern of the Vicinal Oxygen Chelate Family in Rapeseed (Brassica napus L.)
Source: PubMed Central journal article supplement (PMC5422514; doi:10.3389/fpls.2017.00745), 2017-05-09

**Whole-genome identification and expression pattern of the vicinal oxygen chelate family in Rapeseed (*Brassica napus* L.)**

Yu Liang<sup>1, 2</sup>, Neng Wan<sup>1</sup>, Zao Cheng<sup>1</sup>, Yufeng Mo<sup>1</sup>, Baolin Liu<sup>1</sup>, Hui Liu<sup>1</sup>, Nadia Raboanatahiry<sup>1</sup>, Yongtai Yin<sup>1</sup>, Maoteng Li<sup>1, 2\*</sup>

<sup>1</sup> Department of Biotechnology, College of Life Science and Technology, Huazhong University of Science and Technology, Wuhan, China, 430074.

<sup>2</sup> Hubei Collaborative Innovation Center for the Characteristic Resources Exploitation of Dabie Mountains, Huanggang Normal University, Huanggang 438000, China

\*correspondence author: E-mail: [limaoteng426@mail.hust.edu.cn](mailto:limaoteng426@mail.hust.edu.cn)

## Supplementary Information:

### Image legends

**Image S3. Predicted functional network of VOC proteins.** The VOC amino acid sequences from *B. napus* and *Arabidopsis* were used to be analyzed by STRING. A: Result from BnaVOC proteins with possible functional network. B: Result from dsi-1<sup>VOC</sup> proteins in *Arabidopsis* with possible functional network.

### Image S3

**A**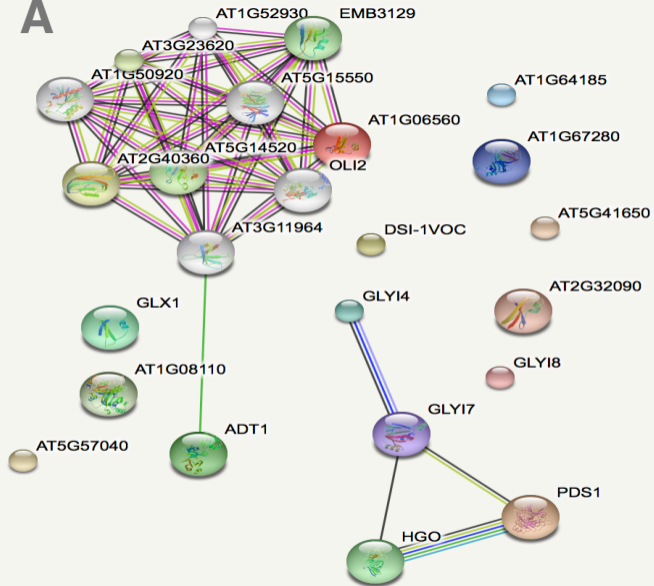**B**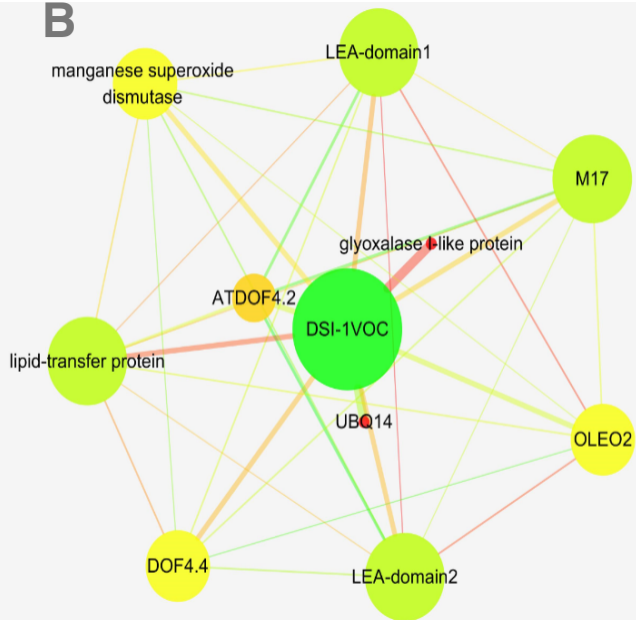

Supplement: Image3.pdf [file Image3.pdf]
